# Supplementary material for: Creation of Bacterial Blight Resistant Rice by Targeting Homologous Sequences of Xa13 and Xa25 Genes
Source: MDPI journal article supplement (doi:10.3390/agronomy14040800), 2024-04-12
Supplement: s1 [file s1]

## Supplemental information

### **CRISPR/Cas9-mediated creating broad-spectrum bacterial blight Resistance in rice by targeting homologous sequences of *Xa13* and *Xa25* genes**

## Contents

Table S1. Genotypes of *xa13/xa25* T<sub>0</sub> mutant plants in five rice varieties.

Table S2. List of primers used in this study.

**Supplemental Table S1.** Genotypes of *xa13/xa25* T<sub>0</sub> mutant plants in five rice varieties

| Variety | T <sub>0</sub> plant | Mutation sequences of <i>Xa13</i> *, Length of deletion (bp)† |       | Mutation sequences of <i>Xa25</i> *, Length of deletion (bp)† |       | mutation type‡ |
|---------|----------------------|---------------------------------------------------------------|-------|---------------------------------------------------------------|-------|----------------|
| WT      |                      | TCGGTGCCGTACGTGGTGGCGCTCTTCAGCTC                              |       | TCCAGTCGGTGCCGTACGTGGTGGCGCTCTTC                              |       |                |
| YXYZ    | #1                   | TCGGTGCCGTAC-----//-----                                      | (-25) | TCCAGTCGGTGCCGTACaGTGGTGGCGCTCTTC                             | (+1)  | DM             |
|         |                      | TCGGTGCCGTAC-----TTCAGCTC                                     | (-12) |                                                               |       |                |
|         | #2                   | TCGGTG-----//-----                                            | (-30) | TCCAGTCGGTGCCGTACtGTGGTGGCGCTCTTC                             | (+1)  | DM             |
|         | #3                   | TCGGTGCCGTACGTGGTGGCGCTCTTCAGCTC                              | (wt)  | TCCAGTCGGTGCCGTACGTGGTGGCGCTCTTC                              | (wt)  | SM             |
|         |                      | TCGGTG-----//-----                                            | (-30) |                                                               |       |                |
|         | #4                   | TCGGTGCCGTAC-----GCGCTCTTCAGCTC                               | (-6)  | TCCAGTCGGTGCCGTACaGTGGTGGCGCTCTTC                             | (+1)  | DM             |
|         |                      | TCGGTG-----//-----                                            | (-30) |                                                               |       |                |
|         | #5                   | TCGGTGCCGTAC-----GCGCTCTTCAGCTC                               | (-6)  | TCCAGTCGGTGCCGT-----//-----                                   | (-25) | DM             |
|         |                      | TCGGTG-----//-----                                            | (-30) | TCCAGTCGGTGCCGT-----//-----                                   | (-23) |                |
|         | #7                   | TCGGTG-----GCGCTCTTCAGCTC                                     | (-12) | TCCAGTCGGTGCCGTACtGTGGTGGCGCTCTTC                             | (+1)  | DM             |
|         | #8                   | TCGGTG-----//-----                                            | (-30) | TCCAGTCGGTGCCGTACGTGGTGGCGCTCTTC                              | (wt)  | SM             |
|         | #9                   | TCGGTGCCGTACGTGGTGGCGCTCTTCAGCTC                              | (wt)  | TCCAGTCGGTGCCGTACgGTGGTGGCGCTCTTC                             | (+1)  | SM             |
|         | #10                  | TCGGTG-----//-----                                            | (-30) | TCCAGTCGGTGCCGTACcGTGGTGGCGCTCTTC                             | (+1)  | DM             |
|         |                      | TCGGTGCCGTACGtTGGTGGCGCTCTTCAGCTC                             | (+1)  |                                                               |       |                |
|         | #11                  | TCGGTGCCGTACGTGGTGGCGCTCTTCAGCTC                              | (wt)  | TCCAGTCGGTGCCGTAC-----//-----                                 | (-25) | SM             |
|         | #12                  | TCGGTGCCGTACGTGGTGGCGCTCTTCAGCTC                              | (wt)  | TCCAGTCGGTGCCGTACGTGGTGGCGCTCTTC                              | (wt)  | SM             |
|         |                      | TCGGTGCCG-----//-----                                         | (-65) |                                                               |       |                |
|         | #13                  | TCGGTGCCGTACGTGGTGGCGCTCTTCAGCTC                              | (wt)  | TCCAGTCGGTGCCGTACGTGGTGGCGCTCTTC                              | (wt)  | SM             |
|         |                      | TCGGTGCCGTACgGTGGTGGCGCTCTTCAGCTC                             | (+1)  |                                                               |       |                |
|         | #14                  | TCGGTGCCGTACtGTGGTGGCGCTCTTCAGCTC                             | (+1)  | TCCAGTCGGTGCCGTACtGTGGTGGCGCTCTTC                             | (+1)  | DM             |
|         |                      | TCGGTGCCGTACgGTGGTGGCGCTCTTCAGCTC                             | (+1)  |                                                               |       |                |
|         | #15                  | TCGGTGCCGTACGTGGTGGCGCTCTTCAGCTC                              | (wt)  | TCCAGTCGGTGCCGTACGTGGTGGCGCTCTTC                              | (wt)  | SM             |
|         |                      | TCGGTGCCGTACtGTGGTGGCGCTCTTCAGCTC                             | (+1)  |                                                               |       |                |

**Supplemental Table S1.** Genotypes of *xa13/xa25* T<sub>0</sub> mutant plants in five rice varieties (Continued)

| Variety | T <sub>0</sub> plant | Mutation sequences of <i>Xa13</i> *, Length of deletion (bp) <sup>†</sup>       | Mutation sequences of <i>Xa25</i> *, Length of deletion (bp) <sup>†</sup>   | mutation type <sup>‡</sup> |
|---------|----------------------|---------------------------------------------------------------------------------|-----------------------------------------------------------------------------|----------------------------|
| YXYZ    | #16                  | TCGGTGCCGTACgGTGGTGGCGCTCTTCAGCTC (+1)                                          | TCCAGTCGGTGCCGTACcGTGGTGGCGCTCTTC (+1)                                      | DM                         |
|         | #17                  | -----//----- (-106)                                                             | TCCAGTCGGTGCCGTACgGTGGTGGCGCTCTTC (+1)<br>TCCAGTCGGTGCCGT-----//----- (-25) | DM                         |
|         | #18                  | TCGGTGCCGTACgGTGGTGGCGCTCTTCAGCTC (+1)                                          | TCCAGTCGGTGCCGTACgGTGGTGGCGCTCTTC (+1)                                      | DM                         |
|         | #19                  | TCGGTGCCGTAC-TGGTGGCGCTCTTCAGCTC (-1)                                           | TCCAGTCGGTGCCGTACGTGGTGGCGCTCTTC (wt)                                       | SM                         |
|         | #20                  | TCGGTGCCGTACtGTGGTGGCGCTCTTCAGCTC (+1)                                          | TCCAGTCGGTGCCGTACGTGGTGGCGCTCTTC (wt)<br>-----//----- (-54)                 | DM                         |
|         | #21                  | TCGGTGCCGTA---GGTGGCGCTCTTCAGCTC (-3)                                           | TCCAGTCGGTGCCGTACgGTGGTGGCGCTCTTC (+1)                                      | DM                         |
|         | #23                  | TCGGTGCCGTACGTGGTGGCGCTCTTCAGCTC (wt)                                           | TCCAGTCGGTG-----TGGCGCTCTTC (-10)                                           | SM                         |
|         | #24                  | TCGGTGCCGTACGTGGTGGCGCTCTTCAGCTC (wt)<br>TCGGTGCCGTACG---GTGGCGCTCTTCAGCTC (-2) | TCCAGTCGGTGCCGTACGTGGTGGCGCTCTTC (wt)<br>-----//----- (-50)                 | DM                         |
|         | #25                  | TCGGTGCCGTACGTG-----CTCTTCAGCTC (-6)<br>TCGGTG-----//----- (-30)                | TCCAGTCGGTGCCGTACgGTGGTGGCGCTCTTC (+1)                                      | DM                         |
|         | #26                  | TCGGTGCCGTACtGTGGTGGCGCTCTTCAGCTC (+1)<br>TCGGTGCCGT-----//----- (-25)          | TCCAGTCGGTG-----//----- (-25)                                               | DM                         |
|         | #27                  | TCGGTG-----//----- (-30)                                                        | TCCAGTCGGTGCCGTACtGTGGTGGCGCTCTTC (+1)                                      | DM                         |
|         | #28                  | TCGGTGCCGTACGTGGTGGCGCTCTTCAGCTC (wt)<br>TCGGTGCCGTACtGTGGTGGCGCTCTTCAGCTC (+1) | TCCAGTCGGTGCCGTACgGTGGTGGCGCTCTTC (+1)                                      | DM                         |
|         | #29                  | TCGGTGCCGTACGTGGTGGCGCTCTTCAGCTC (wt)                                           | TCCAGTCGGTGCCGTACtGTGGTGGCGCTCTTC (+1)                                      | SM                         |

**Supplemental Table S1.** Genotypes of *xa13/xa25* T<sub>0</sub> mutant plants in five rice varieties (Continued)

| Variety | T <sub>0</sub> plant | Mutation sequences of <i>Xa13</i> *, Length of deletion (bp)†                    | Mutation sequences of <i>Xa25</i> *, Length of deletion (bp)† | mutation type‡ |
|---------|----------------------|----------------------------------------------------------------------------------|---------------------------------------------------------------|----------------|
| YXYZ    | #30                  | TCGGTGCCGTACgGTGGTGGCGCTCTTCAGCTC (+1)<br>TCGGTGCCGT-----//----- (-25)           | TCCAGTCGGTGCCGTACGTGGTGGCGCTCTTC (wt)                         | SM             |
|         | #31                  | TCGGTGCCGTACGTGGTGGCGCTCTTCAGCTC (wt)                                            | TCCAGTCGGTGCCGTACaGTGGTGGCGCTCTTC (+1)                        | SM             |
|         | #32                  | TCGGTGCCGTACGTGGTGGCGCTCTTCAGCTC (wt)<br>TCGGTGCCGTACtGTGGTGGCGCTCTTCAGCTC (+1)  | TCCAGTCGGTGCCGTACgGTGGTGGCGCTCTTC (+1)                        | DM             |
| WXSM    | #1                   | TCGGTGCCGTACtGTGGTGGCGCTCTTCAGCTC (+1)<br>TCGGTGCCGTAC-----GCTC (-16)            | TCCAGTCGGTGCCGTAC-TGGTGGCGCTCTTC (-1)                         | DM             |
|         | #2                   | TCGGTGCCGTACtGTGGTGGCGCTCTTCAGCTC (+1)<br>TCGGTGCCGTACgGTGGTGGCGCTCTTCAGCTC (+1) | TCCAGTCGGTGCCGTACcGTGGTGGCGCTCTTC (+1)                        | DM             |
|         | #3                   | TCGGTGCCGTACtGTGGTGGCGCTCTTCAGCTC (+1)<br>TCGG-----CGCTCTTCAGCTC (-15)           | TCCAGTCGGTGCCGTACcGTGGTGGCGCTCTTC (+1)                        | DM             |
|         | #4                   | TCGGTGCCGTACTCGAGGCCGCTCTTCAGCTC (-7_+7)                                         | TCCAGTCGGTGCCGT-----//----- (-30)                             | DM             |
|         | #5                   | TCGGTGCCGTACtGTGGTGGCGCTCTTCAGCTC (+1)<br>TCGGTGCCGT-----//----- (-25)           | TCCAGTCGGTGCCGTAC-----AGCGCTCTTC (-6_+1)                      | DM             |
|         | #6                   | TCGGTGCCGTACtGTGGTGGCGCTCTTCAGCTC (+1)<br>TCGGTGCCGT-----//----- (-25)           | TCCAGTCGGTGCCGTACgGTGGTGGCGCTCTTC (+1)                        | DM             |
|         | #7                   | TCGGTGCCGTACG-----//----- (-39)<br>-----//-----GGTGGCGCTCTTCAGCTC (-19)          | TCCAGTCGGTGCCGTACtGTGGTGGCGCTCTTC (+1)                        | DM             |
|         | #8                   | TCGGTGC-----//----- (-30)                                                        | TCCAGTCGGTGCCGTACGTGGTGGCGCTCTTC (wt)                         | SM             |
|         | #9                   | TCGGTGCCGTACGTGGTGGCGCTCTTCAGCTC (wt)<br>-----//-----GGTGGCGCTCTTCAGCTC (-19)    | TCCAGTCGGTGCCGTACtGTGGTGGCGCTCTTC (+1)                        | DM             |
|         | #10                  | TCGGTGCCGTACGTGGTGGCGCTCTTCAGCTC (wt)                                            | TCCAGTCGGTGCCGTACgGTGGTGGCGCTCTTC (+1)                        | SM             |
|         | #11                  | TCGGTGCCGTACGTGGTGGCGCTCTTCAGCTC (wt)                                            | TCCAGTCGGTGCCGTACaGTGGTGGCGCTCTTC (+1)                        | SM             |

**Supplemental Table S1.** Genotypes of *xa13/xa25* T<sub>0</sub> mutant plants in five rice varieties (Continued)

| Variety | T <sub>0</sub> plant | Mutation sequences of <i>Xa13</i> *, Length of deletion (bp)†                            | Mutation sequences of <i>Xa25</i> *, Length of deletion (bp)†                                      | mutation type‡ |
|---------|----------------------|------------------------------------------------------------------------------------------|----------------------------------------------------------------------------------------------------|----------------|
| WXSM    | #12                  | TCGGTGCCGTACGTGGTGGCGCTCTTCAGCTC (wt)<br>TCGGTGCCGTAC <b>t</b> GTGGTGGCGCTCTTCAGCTC (+1) | TCCAGTCGGTGCCGTACGTGGTGGCGCTCTTC (wt)                                                              | SM             |
|         | #13                  | TCGGTGCCGTACGTGGTGGCGCTCTTCAGCTC (wt)<br>TCGGTGCCGTAC <b>g</b> GTGGTGGCGCTCTTCAGCTC (+1) | TCCAGTCGGTGCCGTACGTGGTGGCGCTCTTC (wt)                                                              | SM             |
|         | #14                  | TCGGTGCCGTAC <b>t</b> GTGGTGGCGCTCTTCAGCTC (+1)                                          | TCCAGTCGGTGCCGTAC <b>g</b> GTGGTGGCGCTCTTC (+1)<br>TCCAGTCGGTGCCGTAC <b>a</b> GTGGTGGCGCTCTTC (+1) | DM             |
|         | #15                  | TCGGTGCCGTACGTGGTGGCGCTCTTCAGCTC (wt)<br>TCGGTGCCGTAC <b>g</b> GTGGTGGCGCTCTTCAGCTC (+1) | TCCAGTCGGTGCCGTACGTGGTGGCGCTCTTC (wt)                                                              | SM             |
|         | #17                  | TCGGTGCCGTACGTGGTGGCGCTCTTCAGCTC (wt)<br>TCGGTGCCGTAC <b>t</b> GTGGTGGCGCTCTTCAGCTC (+1) | TCCAGTCGGTGCCGTAC <b>g</b> GTGGTGGCGCTCTTC (+1)                                                    | DM             |
|         | #18                  | TCGGTGCCGTAC <b>g</b> GTGGTGGCGCTCTTCAGCTC (+1)                                          | TCCAGTCGGTGCCGTACGTGGTGGCGCTCTTC (wt)                                                              | SM             |
|         | #19                  | TCCAGTCGGTGCCGTACGTGGTGGCGCTCTTC (wt)                                                    | TCCAGTCGGTGCCGTAC <b>a</b> GTGGTGGCGCTCTTC (+1)                                                    | SM             |
|         | #20                  | TCGGTGCCGTAC- <b>T</b> GGTGGCGCTCTTCAGCTC (-1)                                           | TCCAGTCGGTGCCGTACGTGGTGGCGCTCTTC (wt)                                                              | SM             |
|         | #21                  | TCGGTGCCGTACGTGGTGGCGCTCTTCAGCTC (wt)<br>TCGGTGCCGT-----//----- (-25)                    | TCCAGTCGGTGCCGTACGTGGTGGCGCTCTTC (wt)                                                              | SM             |
|         | #22                  | TCGGTGCCGTACGTGGTGGCGCTCTTCAGCTC (wt)<br>TCGGTGCCGT-----//----- (-25)                    | TCCAGTCGGTGCCGTACGTGGTGGCGCTCTTC (wt)                                                              | SM             |
|         | #23                  | TCCAGTCGGTGCCGTACGTGGTGGCGCTCTTC (wt)                                                    | TCCAGTCGGTGCCGTAC <b>a</b> GTGGTGGCGCTCTTC (+1)                                                    | SM             |
|         | #24                  | TCGGTGCCGTAC <b>g</b> GTGGTGGCGCTCTTCAGCTC (+1)                                          | TCCAGTCGGTGCCGTAC <b>g</b> GTGGTGGCGCTCTTC (+1)                                                    | DM             |
|         | #25                  | TCGGTGCCGTAC- <b>T</b> GGTGGCGCTCTTCAGCTC (-1)                                           | TCCAGTCGGTGCCGTACGTGGTGGCGCTCTTC (wt)                                                              | SM             |
|         | #26                  | TCGGTGCCGTAC <b>t</b> GTGGTGGCGCTCTTCAGCTC (+1)<br>TCGGTGCCGT-----//----- (-25)          | TCCAGTCGGTGCCGTAC-----//----- (-25)                                                                | DM             |

|      |     |                                        |                                        |    |
|------|-----|----------------------------------------|----------------------------------------|----|
|      | #27 | TCGGTGCCGTACgGTGGTGGCGCTCTTCAGCTC (+1) | TCCAGTCGGTGCCGTACGTGGTGGCGCTCTTC (wt)  | DM |
|      |     |                                        | TCCAGTCGGTGCCGTAC-----//----- (-25)    |    |
|      | #28 | TCGGTGCCGTACtGTGGTGGCGCTCTTCAGCTC (+1) | TCCAGTCGGTGCCGTACaGTGGTGGCGCTCTTC (+1) | DM |
|      | #29 | TCCAGTCGGTGCCGTACGTGGTGGCGCTCTTC (wt)  | TCCAGTCGGTGCCGTACtGTGGTGGCGCTCTTC (+1) | SM |
|      | #30 | TCGGTGCCGTACtGTGGTGGCGCTCTTCAGCTC (+1) | TCCAGTCGGTGCC---CGTGGTGGCGCTCTTC (-3)  | DM |
|      |     |                                        | TCCAGTCGGTGCC-----GGTGGCGCTCTTC (-6)   |    |
|      | #31 | TCGGTGCCGTACtGTGGTGGCGCTCTTCAGCTC (+1) | TCCAGTCGGTGCCGTACGTGGTGGCGCTCTTC (wt)  | SM |
|      | #32 | TCCAGTCGGTGCCGTACGTGGTGGCGCTCTTC (wt)  | TCCAGTCGGTGCCGTACaGTGGTGGCGCTCTTC (+1) | SM |
|      | #33 | TCGGTGCCGTACtGTGGTGGCGCTCTTCAGCTC (+1) | TCCAGTCG-----//----- (-43)             | DM |
|      |     | TCGGTGCCGT-----//----- (-25)           |                                        |    |
| S143 | #1  | TCCAGTCGGTGCCGTACGTGGTGGCGCTCTTC (wt)  | TCCAGTCGGTGCCGTACtGTGGTGGCGCTCTTC (+1) | SM |
|      | #2  | TCGGTGCCG-----//----- (-32)            | TCCAGTCGGTGCCGTACGTGGTGGCGCTCTTC (wt)  | SM |
|      |     | TCGGTGCCGTAC-TGGTGGCGCTCTTCAGCTC (-1)  |                                        |    |
|      | #3  | TCGGTGCCGTAC-TGGTGGCGCTCTTCAGCTC (-1)  | TCCAGTCGGTGCCGTACGgTGGTGGCGCTCTTC (+1) | DM |
|      |     |                                        | TCC-----TCTTC (-24)                    |    |
|      | #4  | -----//---A---GGTGGCGCTCTTCAGCTC (-13) | TCCAGTCGGTGCCGTACGgTGGTGGCGCTCTTC (+1) | DM |
|      |     | TCGGTGCCGTACtGTGGTGGCGCTCTTCAGCTC (+1) | TCCAGTCGGA-----TCTTC (-18_+1)          |    |
|      | #5  | TCGGTGCCGTAC-TGGTGGCGCTCTTCAGCTC (-1)  | TCCAGTCGGTGCCGTACGTGGTGGCGCTCTTC (wt)  | DM |
|      |     |                                        | -----//----- (-54)                     |    |
|      | #6  | TCGGTGCCGTGCCGTACGTGGTGGCGCTCTTC (wt)  | TCCAGTCGGTGCCGTACtGTGGTGGCGCTCTTC (+1) | SM |
|      | #7  | TCGGTGCCGTAC-----GGCGCTCTTCAGCTC (-5)  | TCCAGTCGGTGCCGTACGgTGGTGGCGCTCTTC (+1) | DM |
|      |     | TCGGTGCCGTACaGTGGTGGCGCTCTTCAGCTC (+1) |                                        |    |
|      | #8  | TCGGTGCCGTACgGTGGTGGCGCTCTTCAGCTC (+1) | TCCAGTCGGTGCCGTACGgTGGTGGCGCTCTTC (+1) | DM |
|      |     | TCGGTGCCGTACaGTGGTGGCGCTCTTCAGCTC (+1) | TCCAGTCGGTGCCGTACGTGGTGGCGCTCTTC (wt)  |    |
|      | #9  | TCGGTGCCGTACGTGGTGGCGCTCTTCAGCTC (wt)  | TCCAGTCGGTGCCGTACGgTGGTGGCGCTCTTC (+1) | DM |
|      |     | -----//---A---GGTGGCGCTCTTCAGCTC (-15) | TCCAGTCGGTGC-----//----- (-48)         |    |

**Supplemental Table S1.** Genotypes of *xa13/xa25* T<sub>0</sub> mutant plants in five rice varieties (Continued)

| Variety | T <sub>0</sub> plant | Mutation sequences of <i>Xa13</i> *, Length of deletion (bp)†                    | Mutation sequences of <i>Xa25</i> *, Length of deletion (bp)†              | mutation type‡ |
|---------|----------------------|----------------------------------------------------------------------------------|----------------------------------------------------------------------------|----------------|
| S143    | #10                  | TCCAGTCGGTGCCGTACGTGGTGGCGCTCTTC (wt)                                            | TCCAGTCGGTGCCGTACcGTGGTGGCGCTCTTC (+1)                                     | SM             |
|         | #11                  | TCGGTGCCGTACGTGGTGGCGCTCTTCAGCTC (wt)                                            | TCCAGTCGGTGCCGTACGgTGGTGGCGCTCTTC (+1)                                     | SM             |
|         | #12                  | TCGGTGCCG-----//----- (-31)<br>TCGGTGCCGTAC-TGGTGGCGCTCTTCAGCTC (-1)             | TCCAGTCGGTGCCGTACGgTGGTGGCGCTCTTC (+1)<br>GGGGGGCGCT-----//----- (-53_+10) | DM             |
|         | #13                  | TCGGTGCCGT-----//----- (-30)<br>TCGGTGCCGTGcAGTGGTGGCGCTCTTCAGCTC (-2_+3)        | TCCAGTCGGTGCCGTACGTGGTGGCGCTCTTC (wt)                                      | SM             |
|         | #14                  | TCCAGTCGGTGCCGTACGTGGTGGCGCTCTTC (wt)                                            | TCCAGTCGGTGCCGTACtGTGGTGGCGCTCTTC (+1)                                     | SM             |
|         | #15                  | TCGGTGCCGTACGgTGGTGGCGCTCTTCAGCTC (+1)                                           | TCC-----//----- (-54)<br>TCCAGTCGGTGCCGTACtGTGGTGGCGCTCTTC (+1)            | DM             |
|         | #16                  | TCGGTGCCGTACGgTGGTGGCGCTCTTCAGCTC (+1)<br>TCGGTGCCGTACG-GGTGGCGCTCTTCAGCTC (-1)  | TCCAGTCGGTGCCGTACGTGGTGGCGCTCTTC (wt)                                      | SM             |
|         | #17                  | TCGGTGCCGTACGgTGGTGGCGCTCTTCAGCTC (+1)                                           | TCCAGTCGGTGCCGTACGTGGTGGCGCTCTTC (wt)<br>-----//----- (-54)                | DM             |
|         | #18                  | TCGGTGCCGTGCCGTACGTGGTGGCGCTCTTC (wt)                                            | TCCAGTCGGTGCCGTACgGTGGTGGCGCTCTTC (+1)                                     | SM             |
|         | #19                  | TCGGTGCCGTAC-TGGTGGCGCTCTTCAGCTC (-1)                                            | TCCAGTCGGTGCCGTACGTGGTGGCGCTCTTC (wt)                                      | SM             |
|         | #20                  | TCGGTGCCGTGCCGTACGTGGTGGCGCTCTTC (wt)                                            | TCCAGTCGGTGCCGTACtGTGGTGGCGCTCTTC (+1)                                     | SM             |
|         | #21                  | TCGGTGCCGTACG---TGGCGCTCTTCAGCTC (-3)<br>TCGGTGCCGTACGgTGGTGGCGCTCTTCAGCTC (+1)  | TCCAGTCGGTGCCGTACGgTGGTGGCGCTCTTC (+1)<br>GGGGGGCGCT-----//----- (-53_+10) | DM             |
|         | #22                  | TCGGTGCCGTACgGTGGTGGCGCTCTTCAGCTC (+1)                                           | TCCAGTCGGTGCCGTACtGTGGTGGCGCTCTTC (+1)                                     | DM             |
|         | #23                  | TCGGTGCCGTACgGTGGTGGCGCTCTTCAGCTC (+1)<br>TCGGTGCCGTACaGTGGTGGCGCTCTTCAGCTC (+1) | TCCAGTCGGTGCCGTACGTGGTGGCGCTCTTC (wt)                                      | SM             |

**Supplemental Table S1.** Genotypes of *xa13/xa25* T<sub>0</sub> mutant plants in five rice varieties (Continued)

| Variety | T <sub>0</sub> plant | Mutation sequences of <i>Xa13</i> *, Length of deletion (bp)†                    | Mutation sequences of <i>Xa25</i> *, Length of deletion (bp)†              | mutation type‡ |
|---------|----------------------|----------------------------------------------------------------------------------|----------------------------------------------------------------------------|----------------|
| S143    | #24                  | TCGGTGCCGTACgGTGGTGGCGCTCTTCAGCTC (+1)<br>TCGGTGCCGTACcGTGGTGGCGCTCTTCAGCTC (+1) | TCCAGTCGGTGCCGTACGTGGTGGCGCTCTTC (wt)                                      | SM             |
|         | #25                  | TCGGTGCCGTACGTGGTGGCGCTCTTCAGCTC (wt)<br>TCGGTGCCGTACtGTGGTGGCGCTCTTCAGCTC (+1)  | TCCAGTCGGTGCCGTACGTGGTGGCGCTCTTC (wt)                                      | SM             |
|         | #26                  | TCGGTGCCGTACgGTGGTGGCGCTCTTCAGCTC (+1)                                           | TCCAGTCGGTGCCGTACtGTGGTGGCGCTCTTC (+1)                                     | DM             |
| ZNS     | #1                   | TCGGTGCCGTA-----GCGCTCTTCAGCTC (-7)<br>TCGGTGCCGTACtGTGGTGGCGCTCTTCAGCTC (+1)    | TCCAGTCGGTGCCGT-----//----- (-25)                                          | DM             |
|         | #2                   | TCGGTGCCGTGCCGTACGTGGTGGCGCTCTTC (wt)                                            | TCCAGTCGGTGCCGTACcGTGGTGGCGCTCTTC (+1)                                     | SM             |
|         | #3                   | TCGGTGCCGTACtGTGGTGGCGCTCTTCAGCTC (+1)                                           | TCCAGTCGGTGCCGTACgGTGGTGGCGCTCTTC (+1)                                     | DM             |
|         | #4                   | TCGGTGCCGTAC-TGGTGGCGCTCTTCAGCTC (-1)                                            | TCCAGTCGGTGCCGTACGTGGTGGCGCTCTTC (wt)                                      | SM             |
|         | #5                   | TCGGTGCCGTACgGTGGTGGCGCTCTTCAGCTC (+1)                                           | TCCAGTCGGTGCCGTACgGTGGTGGCGCTCTTC (+1)                                     | DM             |
|         | #6                   | TCGGTGCCGTACtGTGGTGGCGCTCTTCAGCTC (+1)                                           | TCCAGTCGGTGCCGTACtGTGGTGGCGCTCTTC (+1)                                     | DM             |
|         | #7                   | TCGGTGCCGTACGTGGTGGCGCTCTTCAGCTC (wt)                                            | TCCAGTCGGTGCCGT-----//----- (-25)<br>TCCAGTCGGTGCCGTACGTGGTGGCGCTCTTC (wt) | SM             |
|         | #8                   | TCGGTGCCGTACtGTGGTGGCGCTCTTCAGCTC (+1)                                           | TCCAGTCGGTGCCGTACGTGGTGGCGCTCTTC (wt)                                      | SM             |
|         | #9                   | TCCAGTCGGTGCCGTACGTGGTGGCGCTCTTC (wt)                                            | TCCAGTCGGTGCCGTACcGTGGTGGCGCTCTTC (+1)                                     | SM             |
|         | #10                  | TCGGTGCCGTACgGTGGTGGCGCTCTTCAGCTC (+1)                                           | TCCAGTCGGTGCCGTACtGTGGTGGCGCTCTTC (+1)                                     | DM             |
|         | #11                  | TCGGTGCCGTGCCGTACGTGGTGGCGCTCTTC (wt)                                            | TCCAGTCGGTGCCGTACcGTGGTGGCGCTCTTC (+1)                                     | SM             |

**Supplemental Table S1.** Genotypes of *xa13/xa25* T<sub>0</sub> mutant plants in five rice varieties (Continued)



| Variety | T <sub>0</sub><br>plant | Mutation sequences of <i>Xa13</i> *, Length of deletion (bp) <sup>†</sup>       | Mutation sequences of <i>Xa25</i> *, Length of deletion (bp) <sup>†</sup>       | mutation<br>type <sup>‡</sup> |
|---------|-------------------------|---------------------------------------------------------------------------------|---------------------------------------------------------------------------------|-------------------------------|
| ZNS     | #12                     | TCGGTGCCGTACgGTGGTGGCGCTCTTCAGCTC (+1)<br>TCGGTGCCGTGCCGTACGTGGTGGCGCTCTTC (wt) | TCCAGTCGGTGCCGTACGTGGTGGCGCTCTTC (wt)                                           | SM                            |
|         | #13                     | TCGGTGCCGTGCCGTACGTGGTGGCGCTCTTC (wt)                                           | TCCAGTCGGTGCCGTACcGTGGTGGCGCTCTTC (+1)                                          | SM                            |
|         | #14                     | TCGGTGCCGTGCCGTACGTGGTGGCGCTCTTC (wt)                                           | TCCAGTCGGTGCCGTACGTGGTGGCGCTCTTC (wt)<br>TCCAGTCGGTGCCGTACgGTGGTGGCGCTCTTC (+1) | SM                            |
|         | #15                     | TCGGTGCCGTAC-----CGCTCTTCAGCTC (-7)<br>TCGGTGCCGTACtGTGGTGGCGCTCTTCAGCTC (+1)   | TCCAGTCGGTGCCGT-----//----- (-25)                                               | DM                            |
|         | #16                     | TCGGTGCCGTACtGTGGTGGCGCTCTTCAGCTC (+1)                                          | TCCAGTCGGTGCCGTACGTGGTGGCGCTCTTC (wt)                                           | SM                            |
|         | #17                     | TCGGTGCCGTACgGTGGTGGCGCTCTTCAGCTC (+1)                                          | TCCAGTCGGTGCCGTACtGTGGTGGCGCTCTTC (+1)                                          | DM                            |
|         | #18                     | TCGGTGCCGTACaGTGGTGGCGCTCTTCAGCTC (+1)                                          | TCCAGTCGGTGCCGTACGTGGTGGCGCTCTTC (wt)                                           | SM                            |
|         | #19                     | TCGGTGCCGTGCCGTACGTGGTGGCGCTCTTC (wt)                                           | TCCAGTCGGTGCCGTACtGTGGTGGCGCTCTTC (+1)                                          | SM                            |
| GFB     | #20                     | TCGGTGCCGTACgGTGGTGGCGCTCTTCAGCTC (+1)                                          | TCCAGTCGGTGCCGTACGTGGTGGCGCTCTTC (wt)                                           | SM                            |
|         | #1                      | TCGGTGCCGTACcGTGGTGGCGCTCTTCAGCTC (+1)                                          | TCCAGTCGGTGCCGTACGTGGTGGCGCTCTTC (wt)                                           | SM                            |
|         | #2                      | TCGGTGCCGTACGTG-TGGCGCTCTTCAGCTC (-1)<br>TCGGTGCCGT----GGTGGCGCTCTTCAGCTC (-4)  | TCCAGTCGGTGCCGTACgGTGGTGGCGCTCTTC (+1)                                          | DM                            |
|         | #4                      | TCGGTGCCGTACtGTGGTGGCGCTCTTCAGCTC (+1)<br>TCGGTGCCGT-----//----- (-30)          | TCCAGTCGGTGCCGT-----GGCGCTCTTC (-7)                                             | DM                            |
|         | #5                      | TCGGTGCCGTACtGTGGTGGCGCTCTTCAGCTC (+1)                                          | TCCAGTCGGTGCCGTACGTGGTGGCGCTCTTC (wt)                                           | SM                            |
|         | #6                      | TCGGTGCCGTACtGTGGTGGCGCTCTTCAGCTC (+1)<br>TCGGTGc-----//----- (-30)             | TCCAGTCGGTGCCGTACgGTGGTGGCGCTCTTC (+1)<br>TCCAGTCGGTGCCGT-----GGCGCTCTTC (-7)   | DM                            |

**Supplemental Table S1.** Genotypes of *xa13/xa25* T<sub>0</sub> mutant plants in five rice varieties (Continued)

| Variety | T <sub>0</sub> plant | Mutation sequences of <i>Xa13</i> *, Length of deletion (bp)†                    | Mutation sequences of <i>Xa25</i> *, Length of deletion (bp)†                   | mutation type‡ |
|---------|----------------------|----------------------------------------------------------------------------------|---------------------------------------------------------------------------------|----------------|
| GFB     | #7                   | TCGGTGCCGTACgGTGGTGGCGCTCTTCAGCTC (+1)<br>TCGGTGCC-----TGGCGCTCTTCAGCTC (-8)     | TCCAGTCGGTGCCGTACgGTGGTGGCGCTCTTC (+1)<br>TCCAGTCGGTGCCGTACG-----CGCTCTTC (-6)  | DM             |
|         | #8                   | TCGGTGCCGTACtGTGGTGGCGCTCTTCAGCTC (+1)                                           | TCCAGTCGGTGCCGTACtGTGGTGGCGCTCTTC (+1)                                          | DM             |
|         | #10                  | TCGGTGCCGTACgGTGGTGGCGCTCTTCAGCTC (+1)<br>TCGGTGCCGT-----//----- (-30)           | TCCAGTCGGTGCCGTACtGTGGTGGCGCTCTTC (+1)                                          | DM             |
|         | #11                  | TCGGTGCCGTACgGTGGTGGCGCTCTTCAGCTC (+1)                                           | TCCAGTCGGTGCCGTACgGTGGTGGCGCTCTTC (+1)                                          | DM             |
|         | #12                  | TCGGTGCCGTACGTGGTGGCGCTCTTCAGCTC (wt)                                            | TCCAGTCGGTGCCGTAC-TGGTGGCGCTCTTC (-1)                                           | SM             |
|         | #11                  | TCGGTGCCGTACtGTGGTGGCGCTCTTCAGCTC (+1)                                           | TCCAGTCGGTGCCGTACGTGGTGGCGCTCTTC (wt)                                           | SM             |
|         | #14                  | TCGGTGCCGTACgGTGGTGGCGCTCTTCAGCTC (+1)                                           | TCCAGTCGGTGCCGTACgGTGGTGGCGCTCTTC (+1)<br>TCCAGTCGG-----//----- (-25)           | DM             |
|         | #15                  | TCGGTGCCGTACgGTGGTGGCGCTCTTCAGCTC (+1)                                           | TCCAGTCGGTGCCGTACtGTGGTGGCGCTCTTC (+1)<br>TCCAGTCGGTGCCGTAC-TGGTGGCGCTCTTC (-1) | DM             |
|         | #16                  | TCGGTGCCGTAC-TGGTGGCGCTCTTCAGCTC (-1)                                            | TCCAGTCGGTGCCGTACGTGGTGGCGCTCTTC (wt)                                           | SM             |
|         | #17                  | TCGGTGCCGTACgGTGGTGGCGCTCTTCAGCTC (+1)                                           | TCCAGTCGGTGCCGTAC-TGGTGGCGCTCTTC (-1)                                           | DM             |
|         | #18                  | TCGGTGCCGTACgGTGGTGGCGCTCTTCAGCTC (+1)<br>TC-----TTCAGCTC (wt)                   | TCCAGTCGGTGCCGT-----//----- (-25)                                               | DM             |
|         | #19                  | TCGGTGCCGTACgGTGGTGGCGCTCTTCAGCTC (+1)                                           | TCCAGTCGGTGCCGTACtGTGGTGGCGCTCTTC (+1)                                          | DM             |
|         | #20                  | TCGGTGCCGTACgGTGGTGGCGCTCTTCAGCTC (+1)<br>TCGGTGCCGTACaGTGGTGGCGCTCTTCAGCTC (+1) | TCCAGTCGGTGCCGTACGTGGTGGCGCTCTTC (wt)                                           | SM             |
|         | #21                  | TCGGTGCCGTACGTGGTGGCGCTCTTCAGCTC (wt)                                            | TCCAGTCGGTGCCGTACgGTGGTGGCGCTCTTC (+1)                                          | SM             |

**Supplemental Table S1.** Genotypes of *xa13/xa25* T<sub>0</sub> mutant plants in five rice varieties (Continued)

| Variety | T <sub>0</sub> plant | Mutation sequences of <i>Xa13</i> *, Length of deletion (bp) <sup>†</sup> | Mutation sequences of <i>Xa25</i> *, Length of deletion (bp) <sup>†</sup> | mutation type <sup>‡</sup> |
|---------|----------------------|---------------------------------------------------------------------------|---------------------------------------------------------------------------|----------------------------|
| GFB     | #22                  | TCGGTGCCGTACgGTGGTGGCGCTCTTCAGCTC (+1)                                    | TCCAGTCGGTGCCGTACGTGGTGGCGCTCTTC (wt)                                     | SM                         |
|         |                      | TCGGTGCCGTACcGTGGTGGCGCTCTTCAGCTC (+1)                                    |                                                                           |                            |
|         | #23                  | TCGGTGCCGTACGTGGTGGCGCTCTTCAGCTC (wt)                                     | TCCAGTCGGTGCCGTACGTGGTGGCGCTCTTC (wt)                                     | SM                         |
|         |                      | TCGGTGCCGTACtGTGGTGGCGCTCTTCAGCTC (+1)                                    |                                                                           |                            |
|         | #24                  | TCGGTGCCGTACgGTGGTGGCGCTCTTCAGCTC (+1)                                    | TCCAGTCGGTGCCGTACGTGGTGGCGCTCTTC (wt)                                     | DM                         |
|         |                      |                                                                           | TCCAGTCGGTGCCGT-----//----- (-25)                                         |                            |
|         | #25                  | TCGGTGCCGTACcGTGGTGGCGCTCTTCAGCTC (+1)                                    | TCCAGTCGGTGCCGTACGTGGTGGCGCTCTTC (wt)                                     | SM                         |
|         |                      |                                                                           |                                                                           |                            |
|         | #26                  | TCGGTGCCGTACtGTGGTGGCGCTCTTCAGCTC (+1)                                    | TCCAGTCGGTGCCGTACGTGGTGGCGCTCTTC (wt)                                     | SM                         |
|         |                      | TCGGTGCCGT-----//----- (-30)                                              |                                                                           |                            |
|         | #27                  | TCGGTGCCGTACGTGGTGGCGCTCTTCAGCTC (wt)                                     | TCCAGTCGGTGCCGTACcGTGGTGGCGCTCTTC (+1)                                    | SM                         |
|         |                      |                                                                           |                                                                           |                            |
|         | #28                  | TCGGTGCCGTACtGTGGTGGCGCTCTTCAGCTC (+1)                                    | TCCAGTCGGTGCCGTACcGTGGTGGCGCTCTTC (+1)                                    | DM                         |
|         |                      |                                                                           | TCCAGTCGG-----//----- (-25)                                               |                            |
|         | #29                  | TCGGTGCCGTACGTGGTGGCGCTCTTCAGCTC (wt)                                     | TCCAGTCGGTGCCGTACcGTGGTGGCGCTCTTC (+1)                                    | SM                         |
|         |                      |                                                                           |                                                                           |                            |
|         | #30                  | TCGGTGCCGTACtGTGGTGGCGCTCTTCAGCTC (+1)                                    | TCCAGTCGGTGCCGTACGTGGTGGCGCTCTTC (wt)                                     | SM                         |
|         |                      |                                                                           |                                                                           |                            |
|         | #31                  | TCGGTGCCGTACgGTGGTGGCGCTCTTCAGCTC (+1)                                    | TCCAGTCGGTGCCGTACgGTGGTGGCGCTCTTC (+1)                                    | DM                         |
|         |                      | TCGGTGCCGT-----//----- (-30)                                              |                                                                           |                            |
|         | #32                  | TCGGTGCCGTACGTGGTGGCGCTCTTCAGCTC (wt)                                     | TCCAGTCGGTGCCGTACcGTGGTGGCGCTCTTC (+1)                                    | SM                         |
|         |                      |                                                                           |                                                                           |                            |
|         | #33                  | TCGGTGCCGTACgGTGGTGGCGCTCTTCAGCTC (+1)                                    | TCCAGTCGG-----GTGGCGCTCTTC (-11)                                          | DM                         |
|         |                      | TCGGTGCCGT-----//----- (-30)                                              |                                                                           |                            |
|         | #34                  | TCGGTGCCGTACGTGGTGGCGCTCTTCAGCTC (wt)                                     | TCCAGTCGGTGCCGTACgGTGGTGGCGCTCTTC (+1)                                    | SM                         |
|         |                      |                                                                           |                                                                           |                            |
|         | #35                  | TCGGTGCCGTACgGTGGTGGCGCTCTTCAGCTC (+1)                                    | TCCAGTCGGTGCCGTACGTGGTGGCGCTCTTC (wt)                                     | SM                         |
|         |                      |                                                                           |                                                                           |                            |

**Supplemental Table S1.** Genotypes of *xa13/xa25* T<sub>0</sub> mutant plants in five rice varieties (Continued)

\*Newly introduced deletions, insertions, and substitutions are indicated by red dashes, red letters and green letters, respectively.

†The numbers indicate the lengths of deletions or insertions compared with wild type in *Oryza rufipogon*; -: deletion;

‡DM: double gene mutation; SM: single gene mutation.

**Supplemental Table S2.** Primers used in this study

| Primer   | Sequence (5'-3')          | Comment                                                                                |
|----------|---------------------------|----------------------------------------------------------------------------------------|
| sgRNA1-F | CAGCTGAAGAGCGCCACCACGTA   | F primer for making Cas9/sgRNA construct 1                                             |
| sgRNA1-R | AACTACGTGGTGGCGCTCTTCAG   | R primer for making Cas9/sgRNA construct 2                                             |
| Cas9-F   | GGGAGATCCAGCTAGAGGTC      | F primer for detecting the <i>Cas9</i> gene in transgenic plants                       |
| Cas9-R   | GGAAGGAGGAAGACAAGG        | R primer for detecting the <i>Cas9</i> gene in transgenic plants                       |
| Hpt-F    | TACACAGCCATCGGTCCAGA      | F primer for detecting the transgenic plants                                           |
| Hpt-R    | TAGGAGGGCGTGGATATGTC      | R primer for detecting the transgenic plants                                           |
| Xa13-F   | TTAATAACCTTCATCACCAGTAGC  | F primer for genotyping mutations in the <i>Xa13</i> target sites in transgenic plants |
| Xa13-R   | CTGTCGTCGTCGAGATCAGT      | R primer for genotyping mutations in the <i>Xa13</i> target sites in transgenic plants |
| Xa25-F   | ATTACCCCCCTTTTAGCACA      | F primer for genotyping mutations in the <i>Xa25</i> target sites in transgenic plants |
| Xa25-R   | TGCAAGCACGCGTTGACC        | R primer for genotyping mutations in the <i>Xa25</i> target sites in transgenic plants |
| OFF1-F   | ATGGCCTTCATGTCCATGGA      | F primer for PCR amplification of the potential off-target sites sgRNA1                |
| OFF1-R   | CTACACTTCCACAACAATG       | R primer for PCR amplification of the potential off-target sites sgRNA1                |
| OFF2-F   | AAGCTTTGTGGGTATCCAGC      | F primer for PCR amplification of the potential off-target sites sgRNA1                |
| OFF2-R   | CGTACAGTTTGTGAAGTGAT      | R primer for PCR amplification of the potential off-target sites sgRNA1                |
| OFF3-F   | ATGGCTAGGCCTGCCGCCGCC     | F primer for PCR amplification of the potential off-target sites sgRNA1                |
| OFF3-R   | CTTCGGGCTCCAGTGCATCGT     | R primer for PCR amplification of the potential off-target sites sgRNA1                |
| OFF4-F   | CTCGGCTTCCTCCACAGCATCGT   | F primer for PCR amplification of the potential off-target sites sgRNA1                |
| OFF4-R   | GGACCCAGGTCTTGATGGCGTCCC  | R primer for PCR amplification of the potential off-target sites sgRNA1                |
| OFF5-F   | CCACCTTCTCGTTGATCCTCCTCCC | F primer for PCR amplification of the potential off-target sites sgRNA1                |
| OFF5-R   | GAAAACCAAACCCTCCCTCCCTCT  | R primer for PCR amplification of the potential off-target sites sgRNA1                |
| OFF6-F   | GCGCTACCCAAACCTCCTCGT     | F primer for PCR amplification of the potential off-target sites sgRNA1                |
| OFF6-R   | AGCGAATCAGATTGATAGTG      | R primer for PCR amplification of the potential off-target sites sgRNA1                |
| OFF7-F   | TAACCACATCTAGCATGCAGT     | F primer for PCR amplification of the potential off-target sites sgRNA1                |
| OFF7-R   | GAGCGGGGCGACGAAGACGG      | R primer for PCR amplification of the potential off-target sites sgRNA1                |
