# Supplementary material for: Creation of Bacterial Blight Resistant Rice by Targeting Homologous Sequences of Xa13 and Xa25 Genes
Source: MDPI journal article supplement (doi:10.3390/agronomy14040800), 2024-04-12
Supplement: s1 [file s1]

### *Xa13*

```
ATCTCCTTCCTGGTGTTCCTTGCAACCAAGTGGCGACGTTCTTGCAAGGTGTACAAGAAGAAGTCGACGGGAGGGTACAGCTC
GGTGCCGTACGTGGTGGCGCTCTTCAGGTCGGTGTGTGGATCTTCTACGCGCTGGTGAAGACCAACTCGAGGCCGCTGC
TGACCATCAACGCCCTTCGGCTGCGGCGTCGAGGCCGCCCTACATCGTCTCTACCTCGTCTACGCGCCGCGCCGCCAGG
CTCCGCAACCCCTCGCCTTCTTCTCTCTCTCGACGTCGCGCGCCTTCGCCCTCATCGTCGTACCAACCCCTCTACCTCGTCCC
CAAGCCCCACCAGGTCAAGTTCCTCGGCAGCGTCTGCCTCGCCTTCTCCATGGCCGTCTTCGTGCGCCCTCTCTCCATCA
TCTTCAAGGTGATCAAGACCAAGAGCGTCGAGTTTCATGCCGATCGGGCTCTCCGTCTGCCTCAGCTCAGCGCCGTTCGCG
TGGTTCTGCTACGGCCTCTTACCAAGGACCCCTACGTCATGTACCCGAACGTGGGCGGCTTCTTCTCAGCTGCGTGCA
GATGGGGCTCTACTTCTGGTACCGGAAGCCGAGGAACACGGCCGTGCTGCCGACGACGTCCGACTCCATGTCCCCGATCT
CCGCGCGCGCCGCCACGACAGAGGGTGATCGAGCTCCCCGCCGCGCACGACGCTTACCATCTGTCCGTGAGCCCC
ATCCCGATCCTCGGCGTGCAACAAGTTCGAGGTGGTGGCCGCCGAGCAGGCGGCCGACGGCGTCGCGCGCGCGCCGCCGCGG
CGACAAGGAGTGTGTCAGAACCAAGCCGAGGTGATCGAGATCACCGCCCGCTGTGA
```

### *Xa25*

```
ATGGCTGGCCTGTCCCTGCAGCATCCCTGGGCTTTTGCCCTTCGGCCTCCTTGGAACCTCATATCCTTCACGACCTATCT
GGCACCAATCCCGACGTTCTACCGGATCTACAAGAGCAAGTCGACGAGGGGTTCCAGTCCGTCCCGTACGTGGTGGCGC
CTTTCAGGGCCATGCTGTGGATCTTCTACGCGCTGATCAAGTCCAACGAGGCCCTCCTCATCACCATCAACGCCGCCGGT
TGCGTCATCGAGACCATCTACATCGTCATGTACCTCGCCTACGCCCCCAAGAAGGCCAAGGTGTTACAGCAGAAGATCCT
GCTGCTGCTGAACGTGGGGGTGTTTCGGGGTGATCCTGCTGCTGCTGACGCTGCTGCTCTCCATGGCGAGCAGCGCTCGTCT
CCCTCGGCTGGGTCTGCGTCGCCTTCTCCGTACGCGTCTTTGTGCGCGCGCTCAGCATCATCAAGCGAGTGATCCAGTCG
AGGAGCGTGGAGTACATGCCCTTCTCCCTCTCCCTCAGCTCACCCCTCAGCGCGTCTGCTGTGGTTCCCTCTACGGCCTTCT
CATCAAGGACAAATACGTCGCGCTTCCCAACATCCTGGGCTTACATTCCGGTGTGGTCCAGATGGGGCTCTACGTGTTCT
ACATGAACGCGACGCCGGTGGCCGGCGAGGGGAAAGAAGGGAAGGGAAGCTGGCGCGCGCGGAGGAGCTCCCGTCGTC
GTCAACGTCGGCAAGCTCGCCGCCGCCACGCCGACAGGAGCACCGCGCGCTGACGTGCACCCAGTCCCGAGGAGCTG
CGCGCGGAGGCGCGCGCGCGGAGCCGAGGTGCTCGTCGACATTCCGCCGCGCGCGCCGCCGCGCGCGCTCGAGGTGG
CCGCCGTGTAG
```

**Supplemental Figure S1.** The CDS of *Xa 13* and *Xa 25* in varieties XYZ. The 30-bp homologous sequence is indicated by Red boxes.
